# Supplementary material for: Synthesis and photovoltaic properties of novel ferrocene-substituted metallophthalocyanines
Source: Royal Society of Chemistry journal article supplement (doi:10.1039/d1dt03104j), 2021-11-15
Supplement: d1dt03104j1.pdf [file d1dt03104j1.pdf]

## Supplementary Information

### Synthesis and Photovoltaic Properties of Novel Ferrocene-Substituted Metallophthalocyanines

Mücahit Özdemir,<sup>[a]</sup> Baybars Köksoy,<sup>\*[b]</sup> Halid Kuruca,<sup>[a]</sup> Ahmet Altındal,<sup>[c]</sup> Mahmut Durmuş,<sup>[d]</sup> Sermet Koyuncu,<sup>[e]</sup> Bahattin Yalçın,<sup>[a]</sup> and Mustafa Bulut<sup>[a]</sup>

---

[a] M. Özdemir, H. Kuruca, Prof. Dr. B. Yalçın, Prof. Dr. M. Bulut  
Department of Chemistry  
Marmara University  
34722 Kadikoy, Istanbul, Turkey

[b] Asst. Prof. Dr. B. Köksoy  
Department of Chemistry  
Bursa Technical University  
16310 Bursa, Turkey  
E-mail: [baybars.koksoy@btu.edu.tr](mailto:baybars.koksoy@btu.edu.tr)

[c] Prof. Dr. A. Altındal  
Department of Physics  
Yildiz Technical University  
34220 Istanbul, Turkey

[d] Prof. Dr. M. Durmuş  
Department of Chemistry  
Gebze Technical University  
41400 Kocaeli, Turkey

[e] Prof. Dr. S. Koyuncu  
Department of Chemical Engineering  
Canakkale Onsekiz Mart University  
17100 Canakkale, Turkey

## TABLE OF CONTENTS

- Figure S1.** The UV-Vis comparison spectra of the unsubstituted metal phthalocyanines.
- Figure S2.** The UV-Vis comparison spectra of the tetrakis(iodo) substituted zinc(II) (**1**), indium(III) (**2**) and lutetium(III) (**3**) phthalocyanines.
- Figure S3.** The UV-Vis comparison spectra of the zinc(II) phthalocyanines.
- Figure S4.** The UV-Vis comparison spectra of the indium(III) phthalocyanines.
- Figure S5.** The UV-Vis comparison spectra of the lutetium(III) phthalocyanines.
- Figure S6.** UV-Vis spectra of phthalocyanine **5** at different concentrations in dichloromethane.
- Figure S7.** UV-Vis spectra of phthalocyanine **6** at different concentrations in dichloromethane.
- Figure S8.** <sup>1</sup>H-NMR spectrum of phthalocyanine **4**.
- Figure S9.** <sup>1</sup>H-NMR spectrum of phthalocyanine **5**.
- Figure S10.** <sup>1</sup>H-NMR spectrum of phthalocyanine **6**.
- Figure S11.** MALDI-TOF-Mass spectrum of phthalocyanine **4** using DHB as a matrix.
- Figure S12.** MALDI-TOF-Mass spectrum of phthalocyanine **5** using DHB as a matrix.
- Figure S13.** MALDI-TOF-Mass spectrum of phthalocyanine **6** using DHB as a matrix.
- Figure 14.** The TGA curve of phthalocyanine **4**.
- Figure 15.** The TGA curve of phthalocyanine **5**.
- Figure S16.** The TGA curve of phthalocyanine **6**.
- Figure S17.** The DSC curve of phthalocyanine **4**.
- Figure S18.** The DSC curve of phthalocyanine **5**.
- Figure S19.** The DSC curve of phthalocyanine **6**.
- Figure S20.** The optimized 3D molecular geometry of indium(III) phthalocyanine (**5**).
- Figure S21.** The optimized 3D molecular geometry of lutetium(III) phthalocyanine (**6**).
- Figure S22.** The calculated electron density surface of compounds **4-6**.

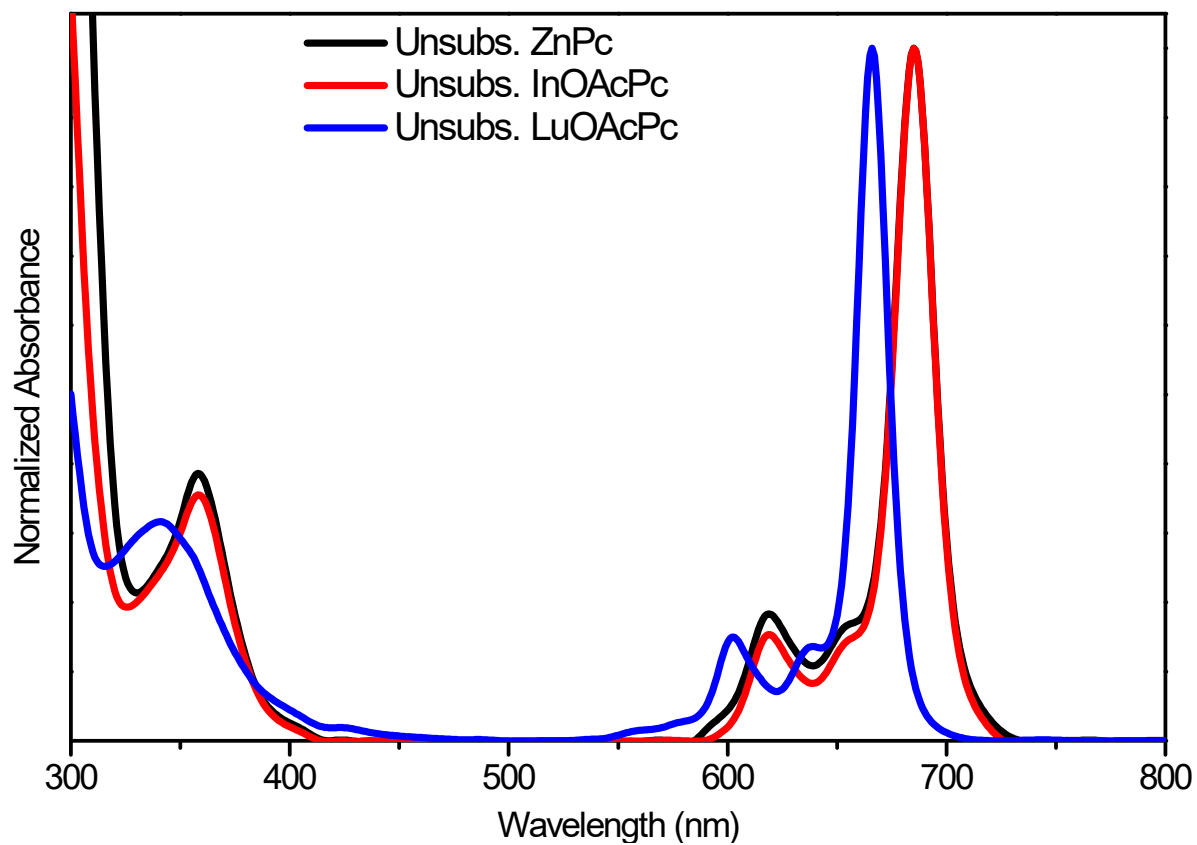

**Figure S1.** The UV-Vis comparison spectra of the unsubstituted metal phthalocyanines.

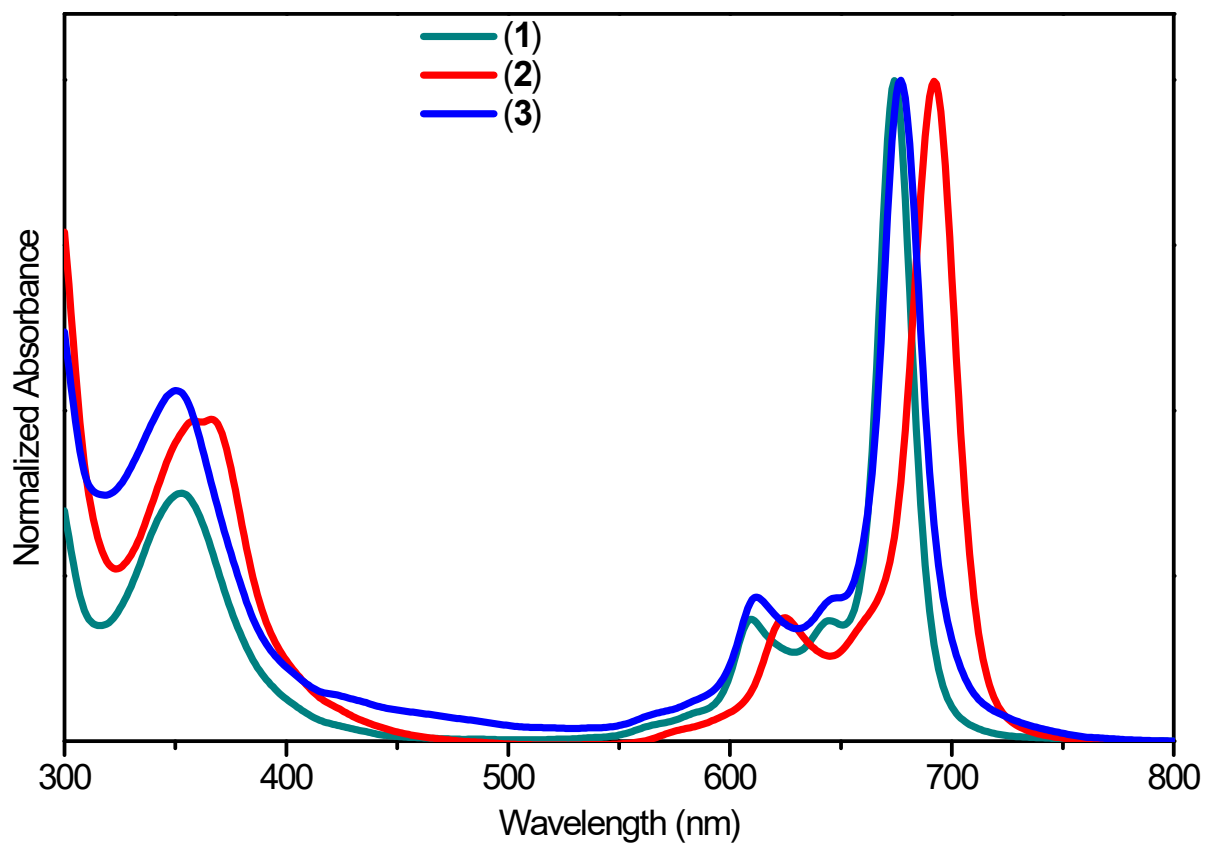

**Figure S2.** The UV-Vis comparison spectra of the tetrakis(iodo) substituted zinc(II) (1), indium(III) (2) and lutetium(III) (3) phthalocyanines.

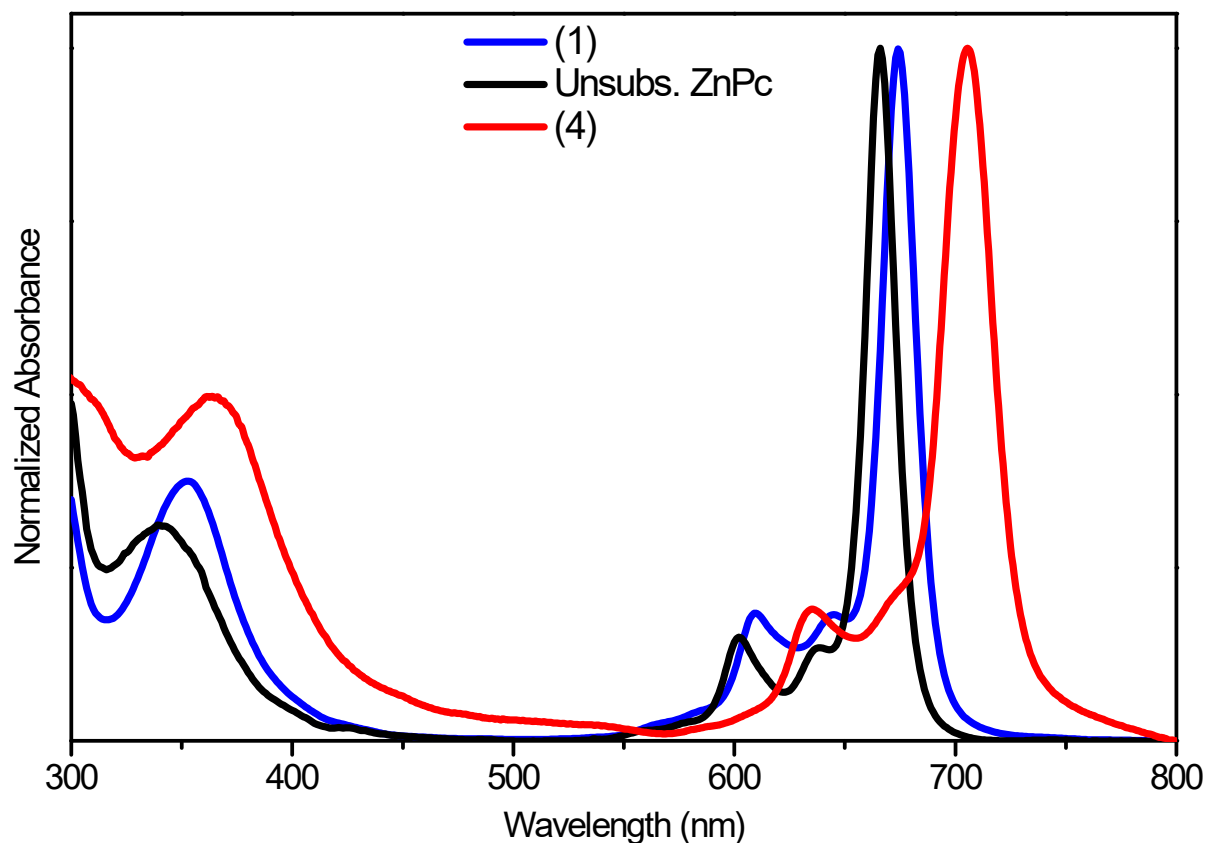

**Figure S3.** The UV-Vis comparison spectra of the zinc(II) phthalocyanines.

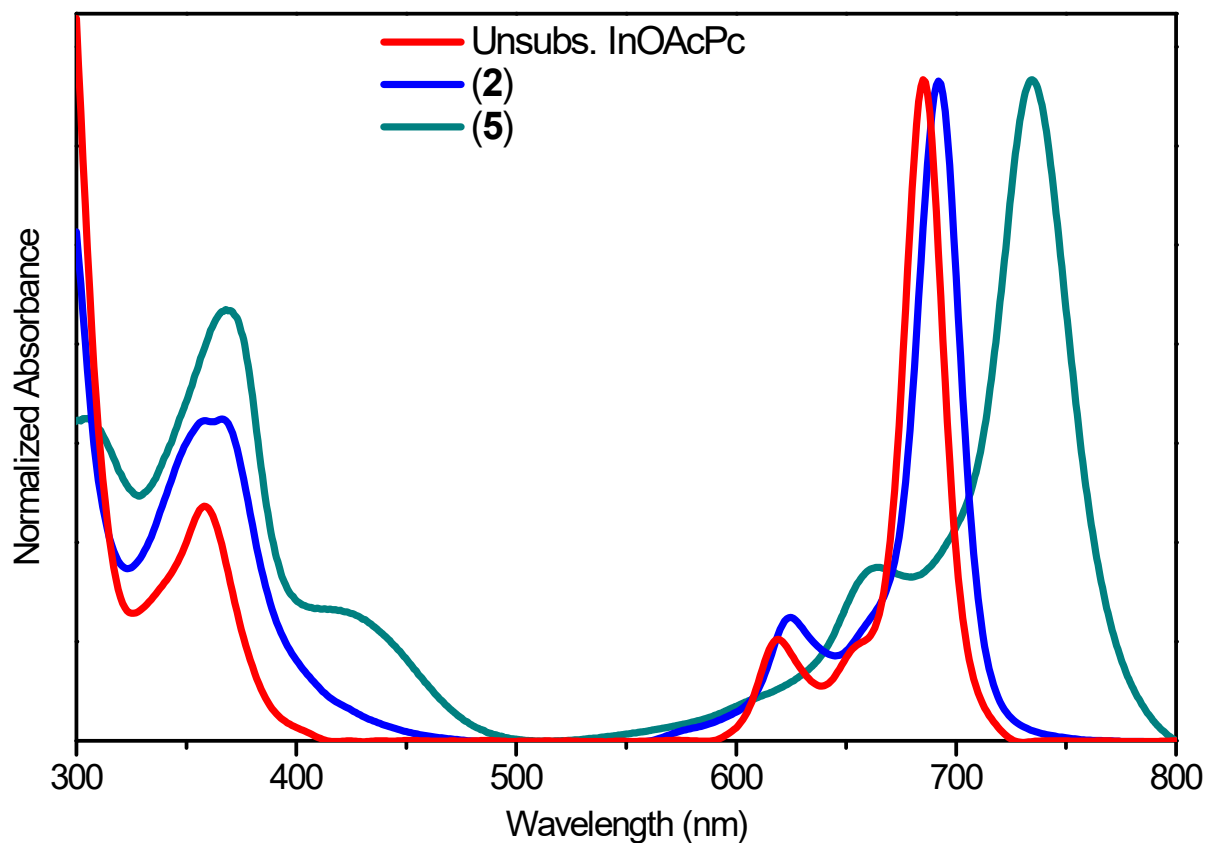

**Figure S4.** The UV-Vis comparison spectra of the indium(III) phthalocyanines.

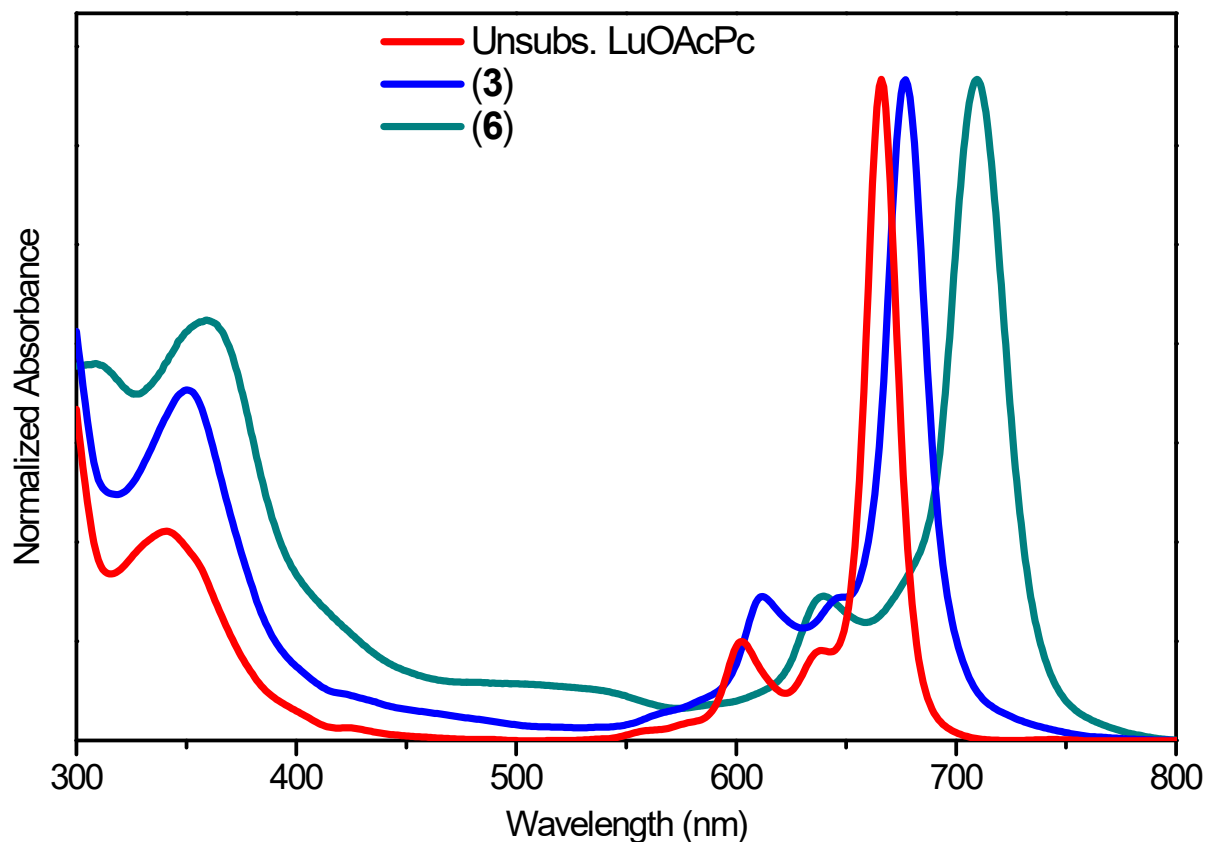

**Figure S5.** The UV-Vis comparison spectra of the lutetium(III) phthalocyanines.

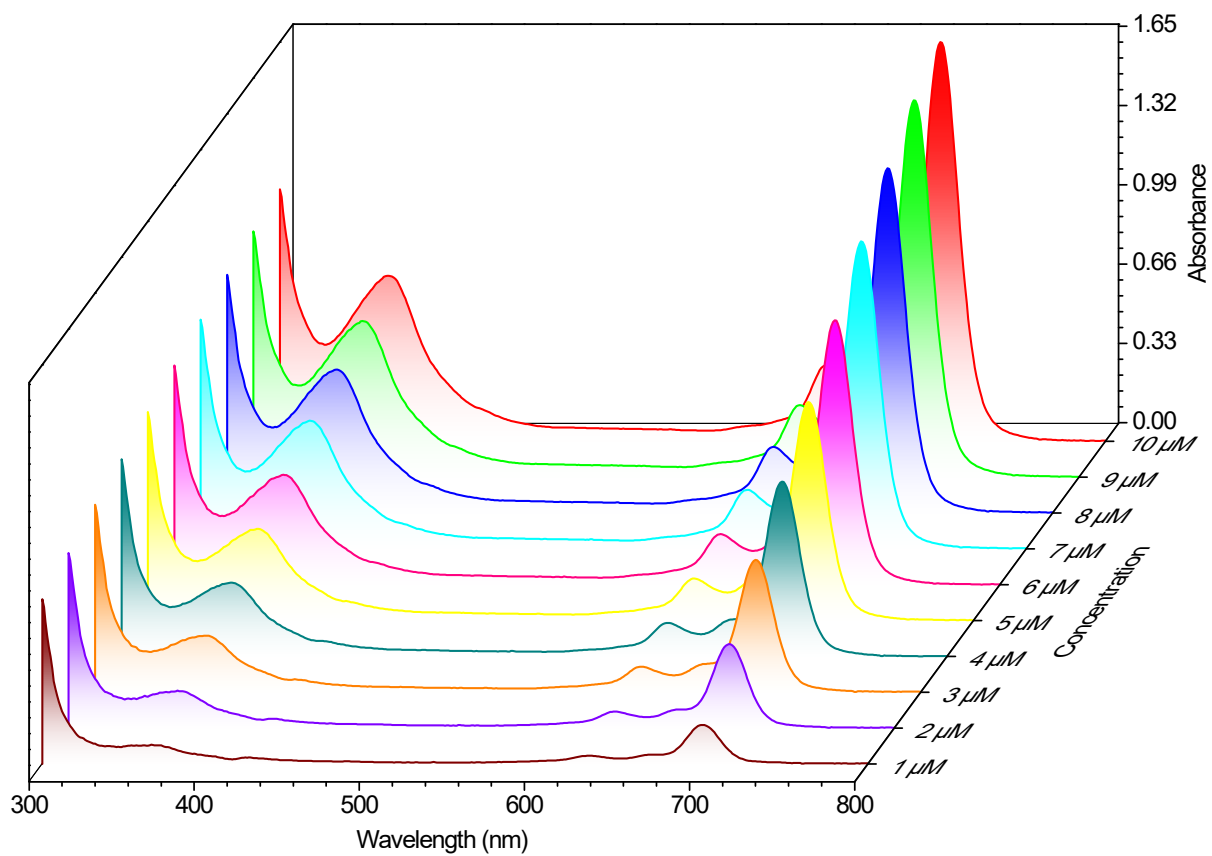

**Figure S6.** UV-Vis spectra of phthalocyanine **4** at different concentrations in dichloromethane.



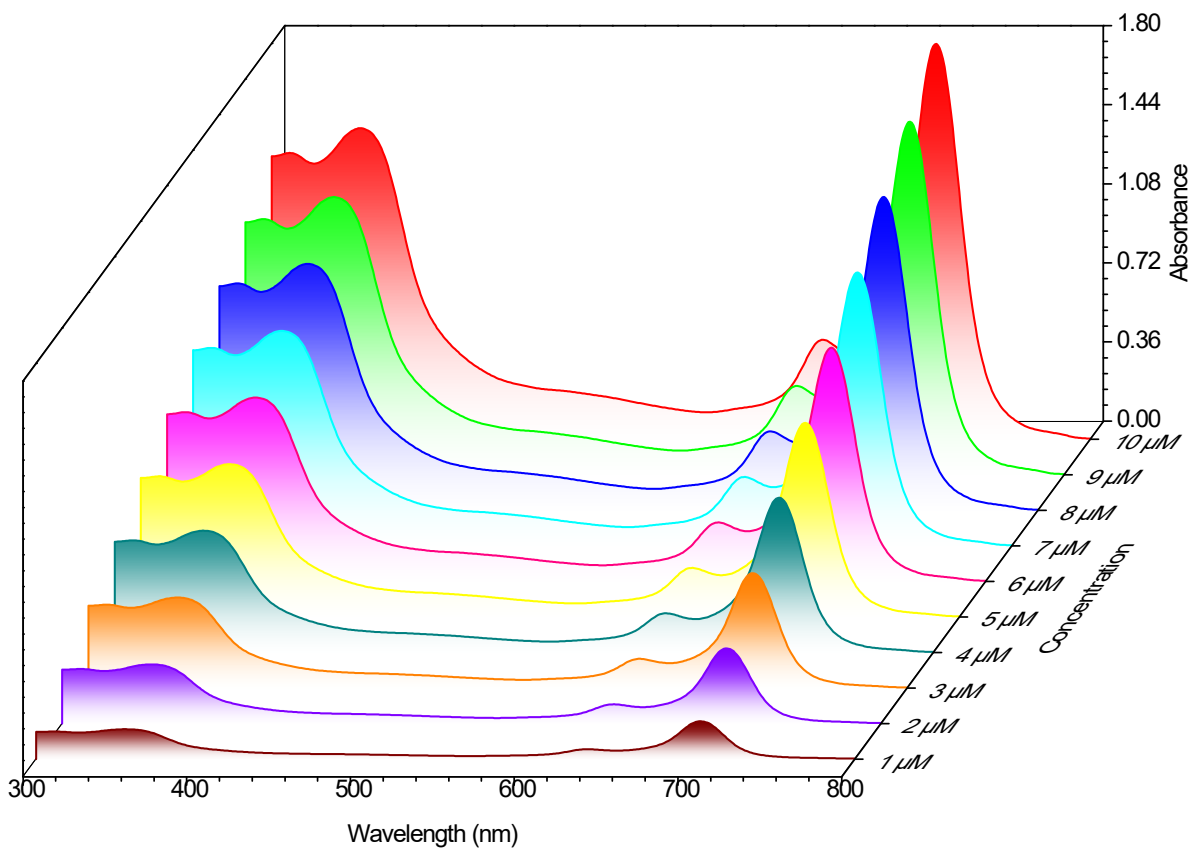

**Figure S7.** UV-Vis spectra of phthalocyanine **6** at different concentrations in dichloromethane.

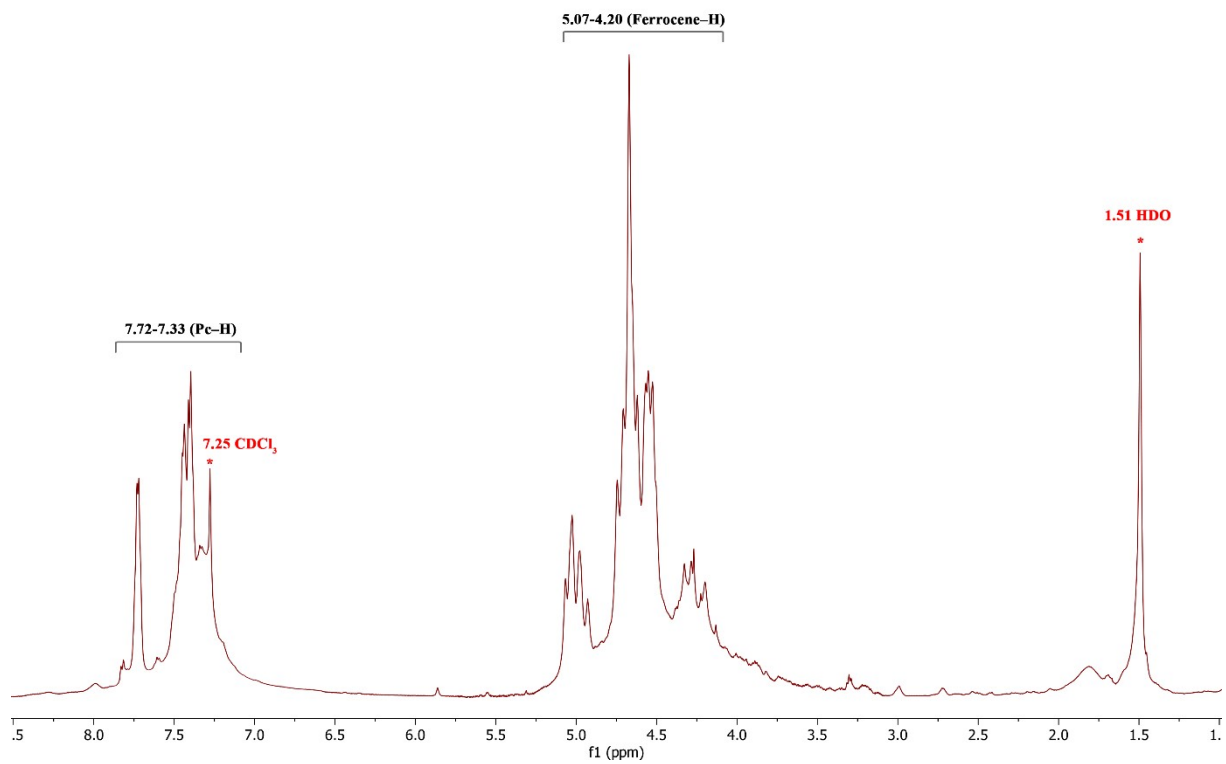

**Figure S8.**  $^1\text{H-NMR}$  spectrum of phthalocyanine 4.

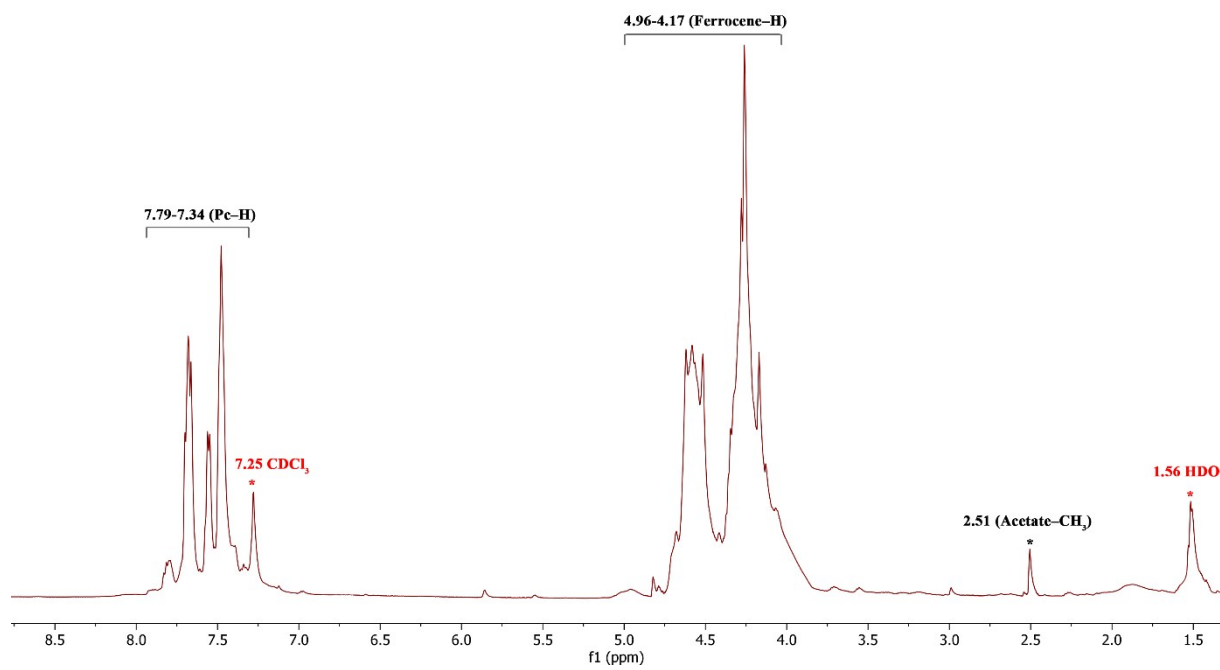

**Figure S9.**  $^1\text{H}$ -NMR spectrum of phthalocyanine 5.

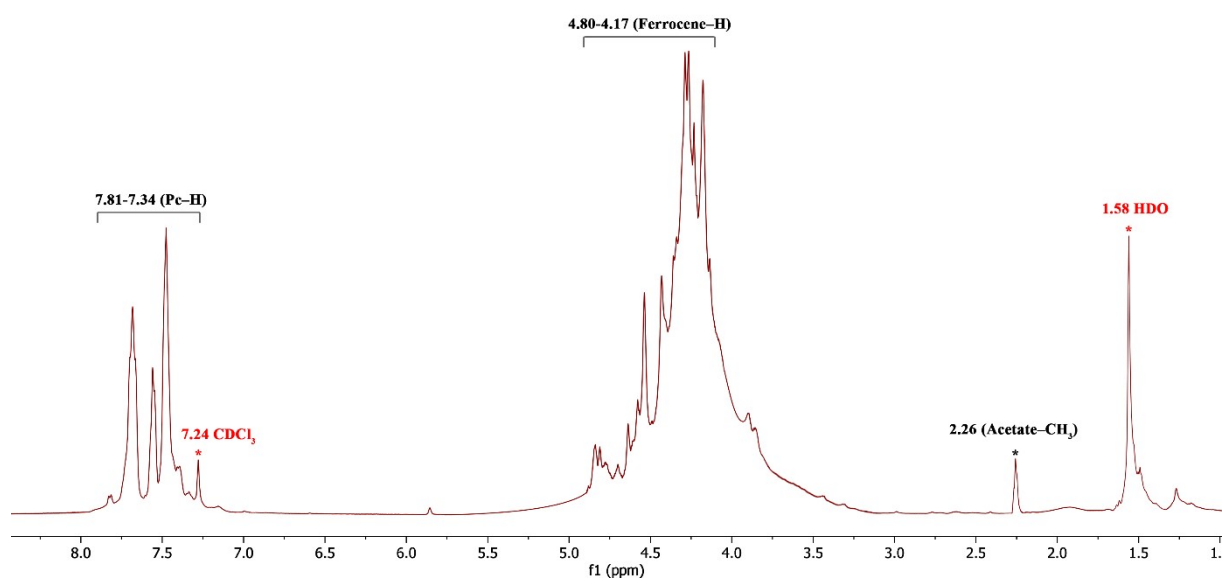

**Figure S10.** <sup>1</sup>H-NMR spectrum of phthalocyanine **6**.

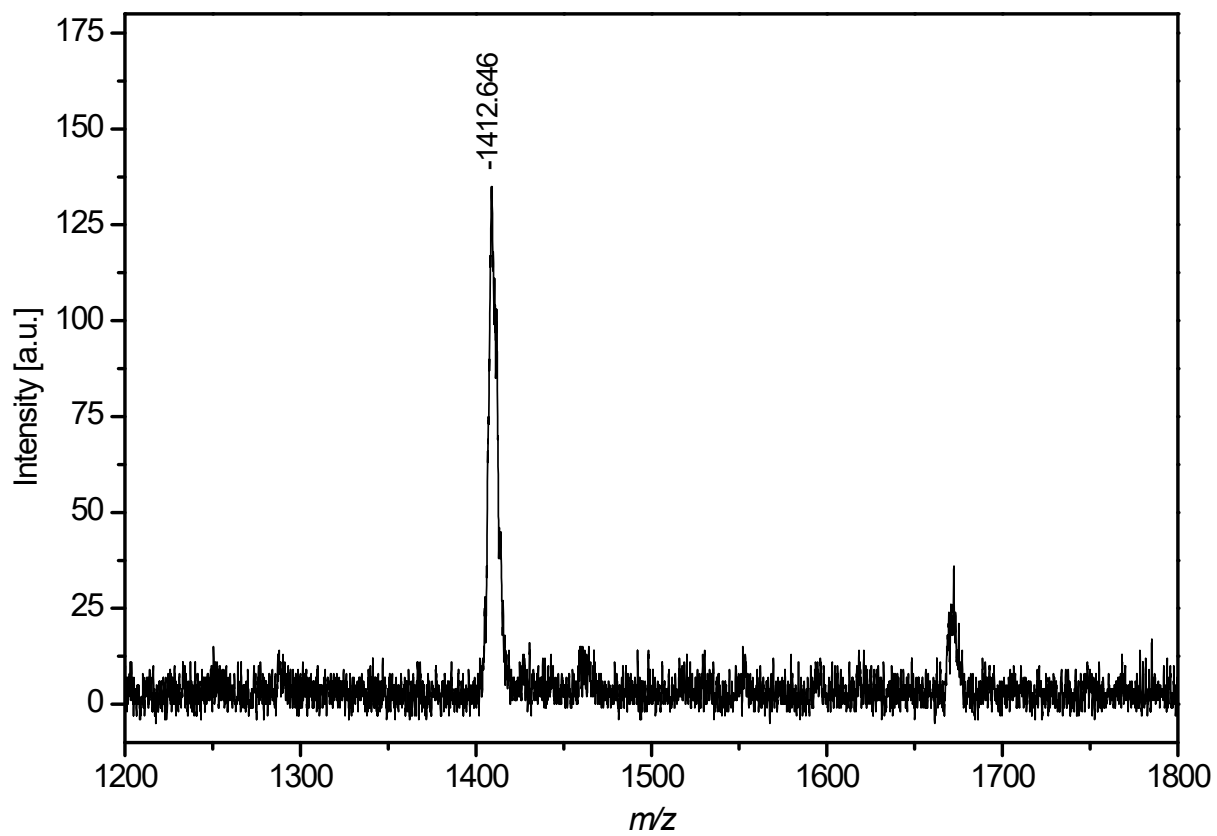

**Figure S11.** MALDI-TOF-Mass spectrum of phthalocyanine **4** using DHB as a matrix.

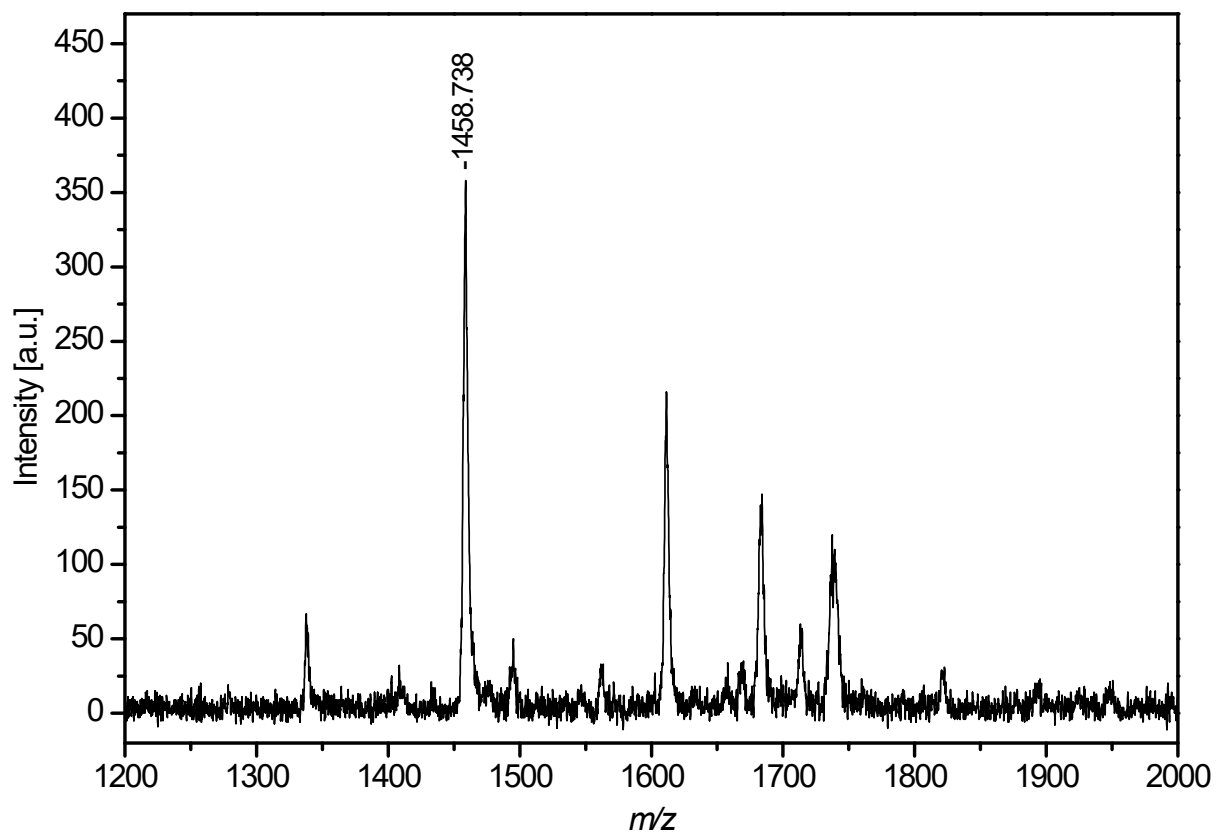

**Figure S12.** MALDI-TOF-Mass spectrum of phthalocyanine **5** using DHB as a matrix.

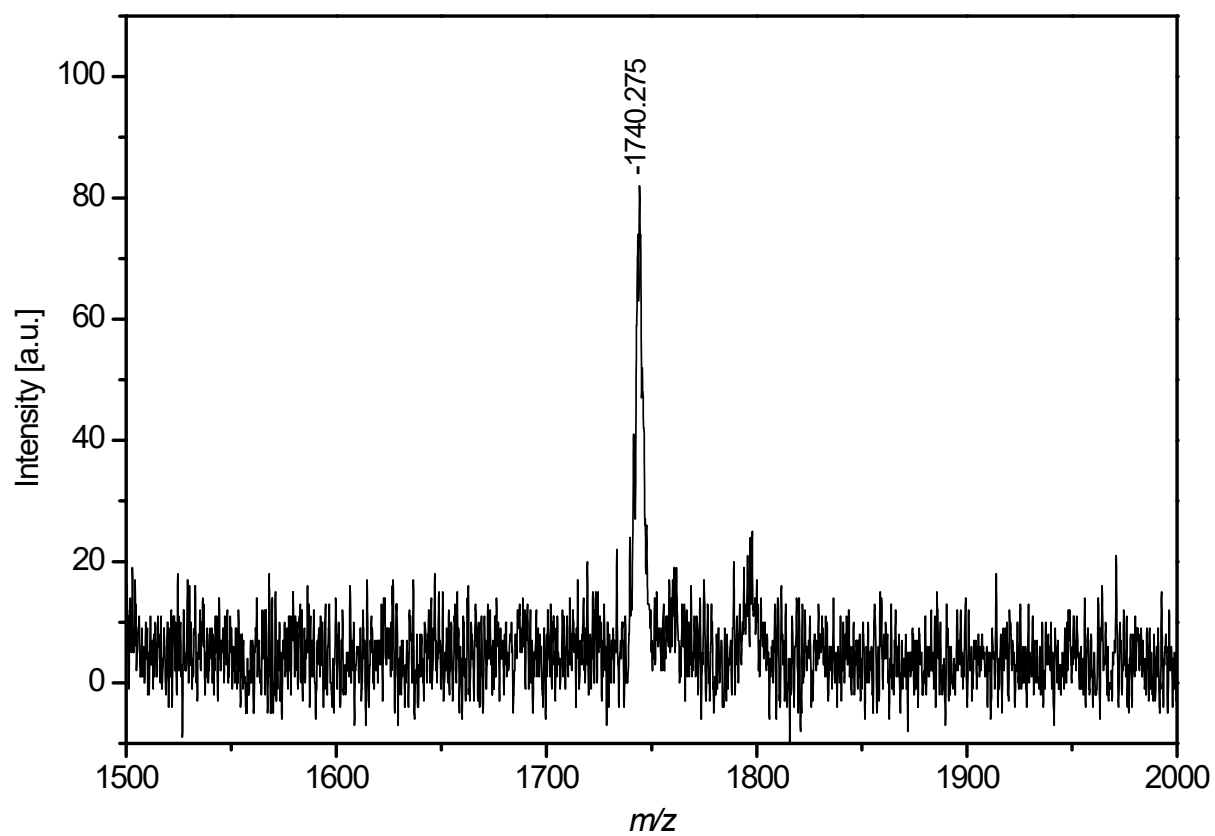

**Figure S13.** MALDI-TOF-Mass spectrum of phthalocyanine **6** using DHB as a matrix.

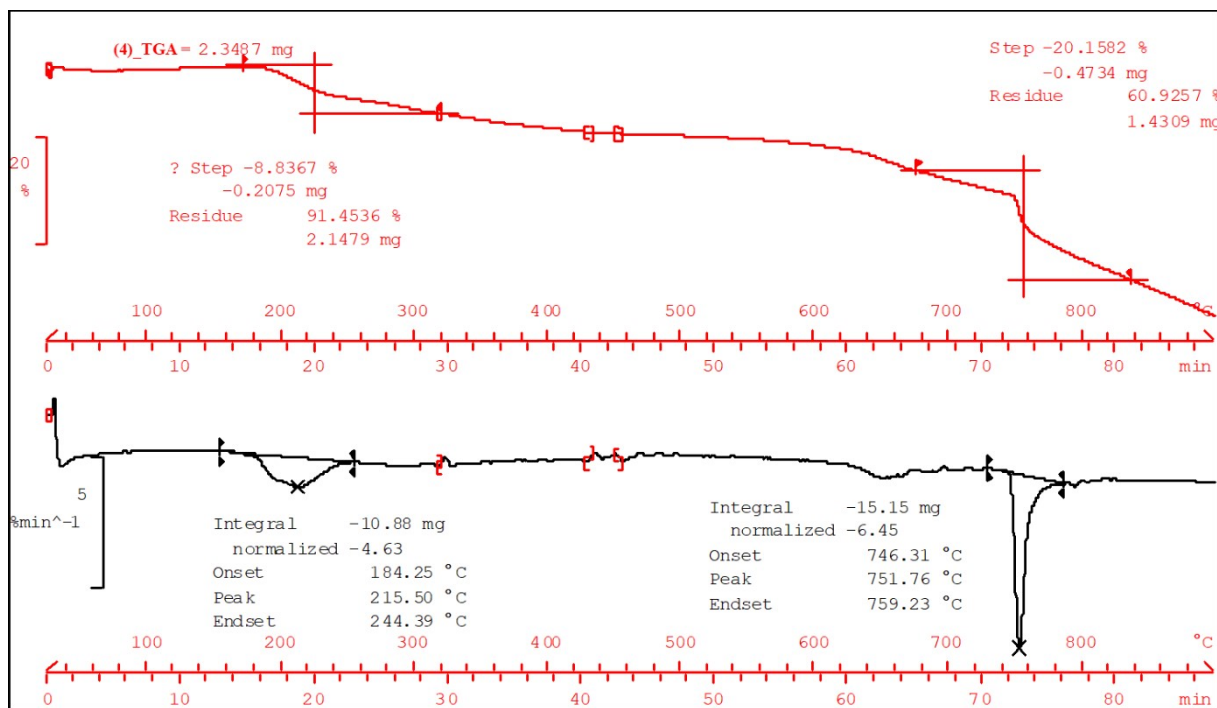

Figure 14. The TGA curve of phthalocyanine 4.



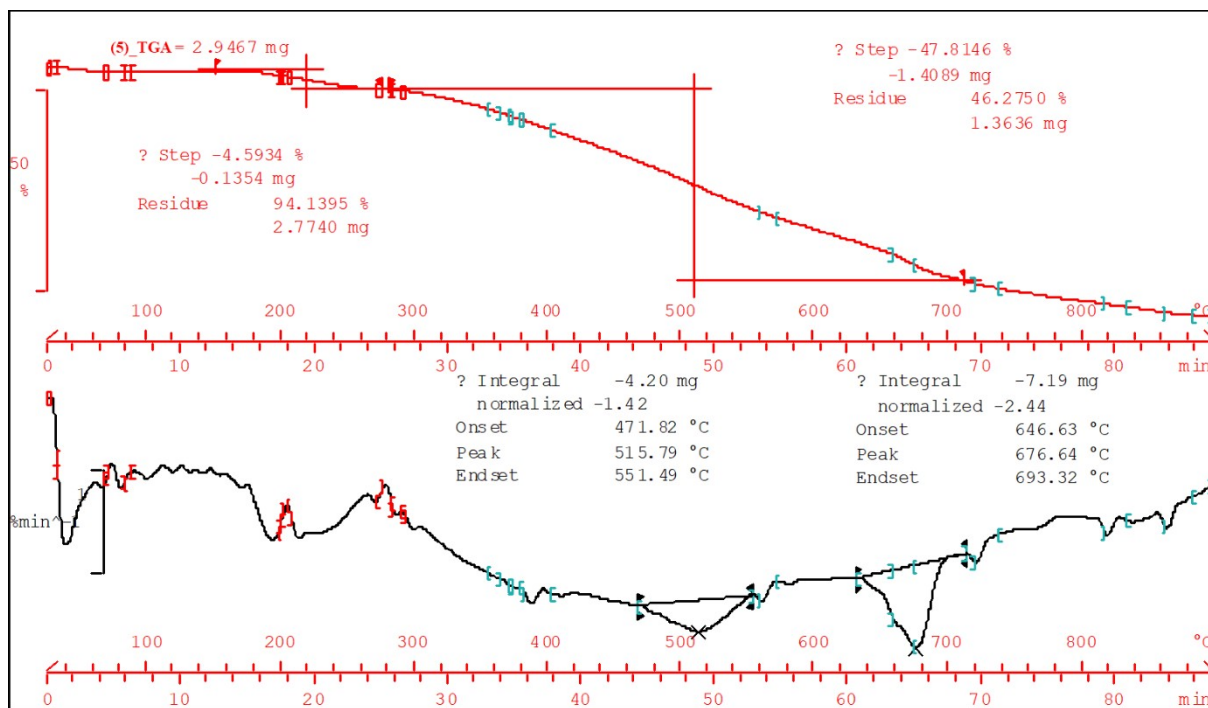

Figure 15. The TGA curve of phthalocyanine 5.

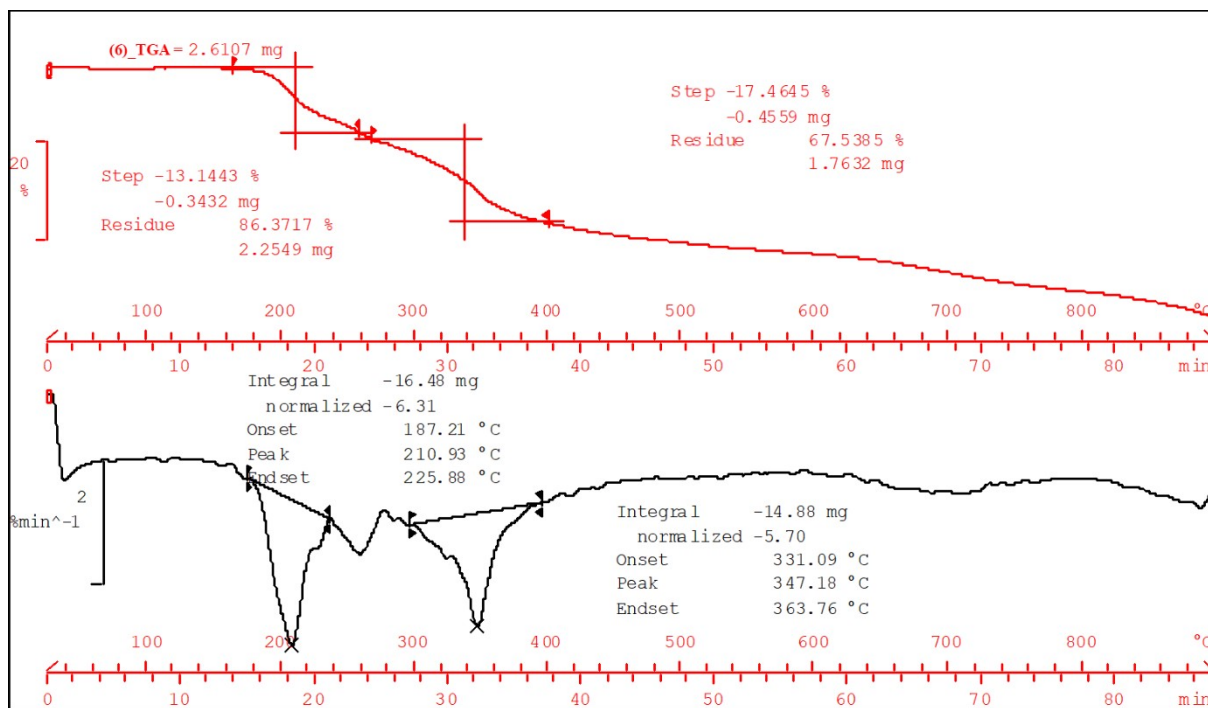

Figure S16. The TGA curve of phthalocyanine 6.

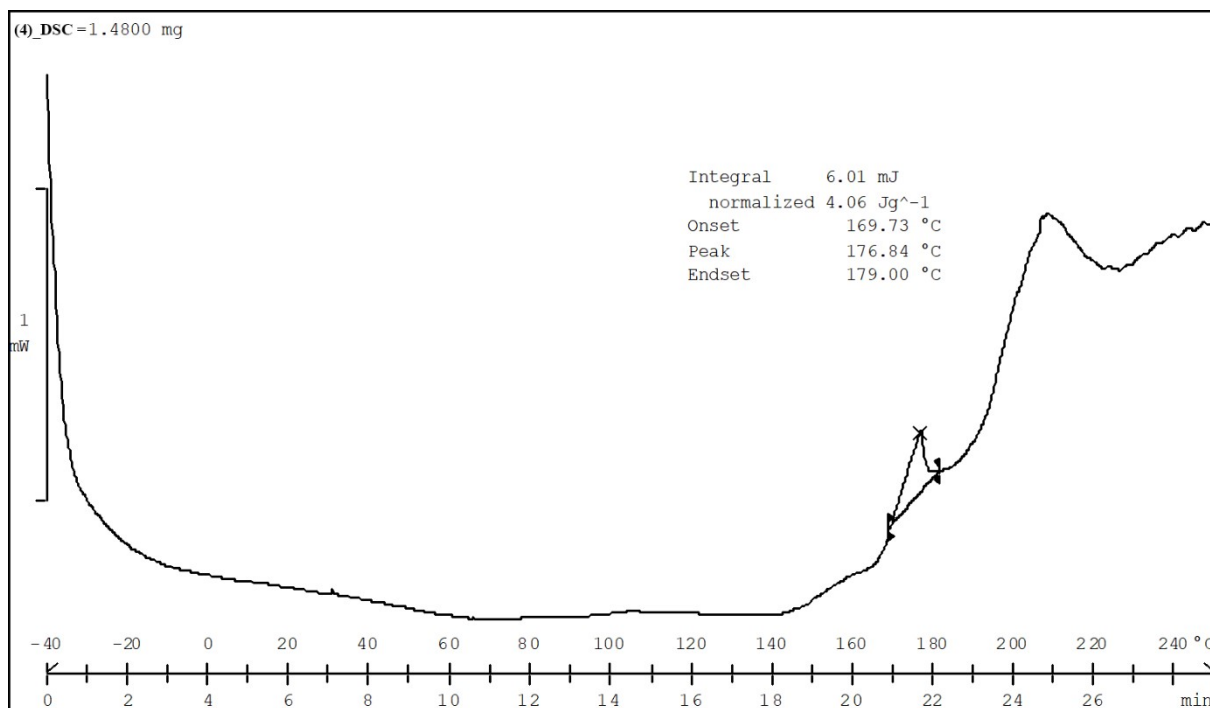

**Figure S17.** The DSC curve of phthalocyanine **4**.

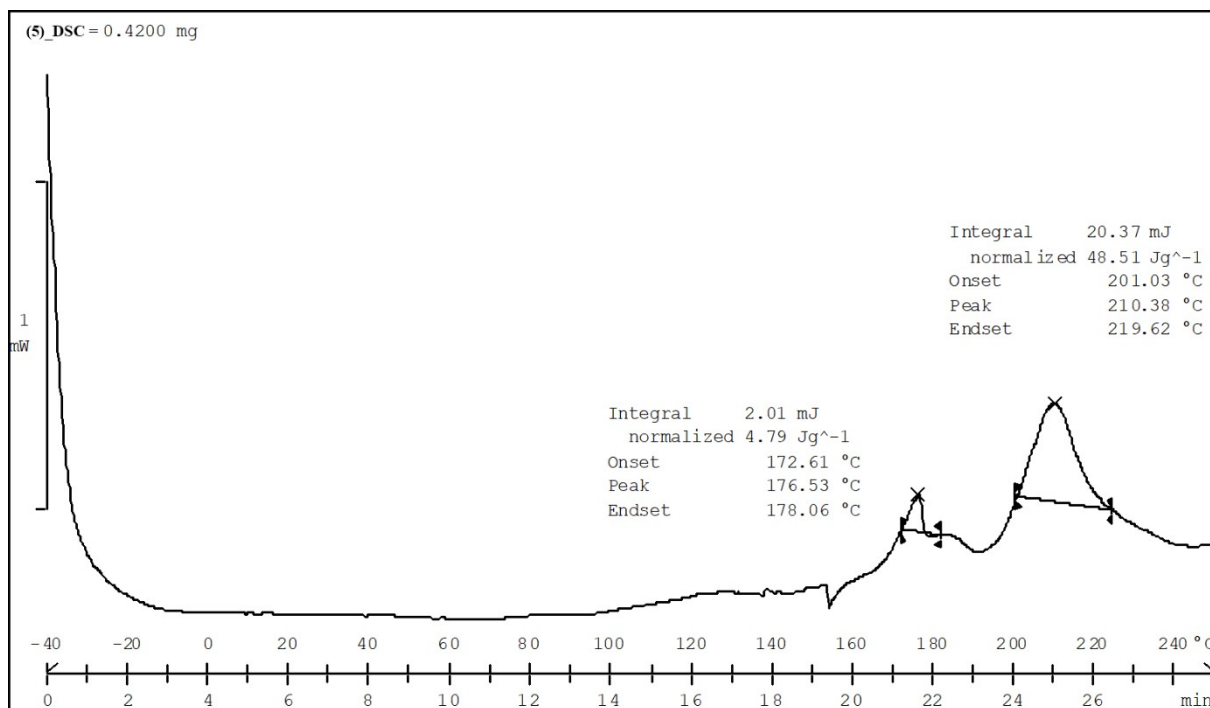

**Figure S18.** The DSC curve of phthalocyanine 5.

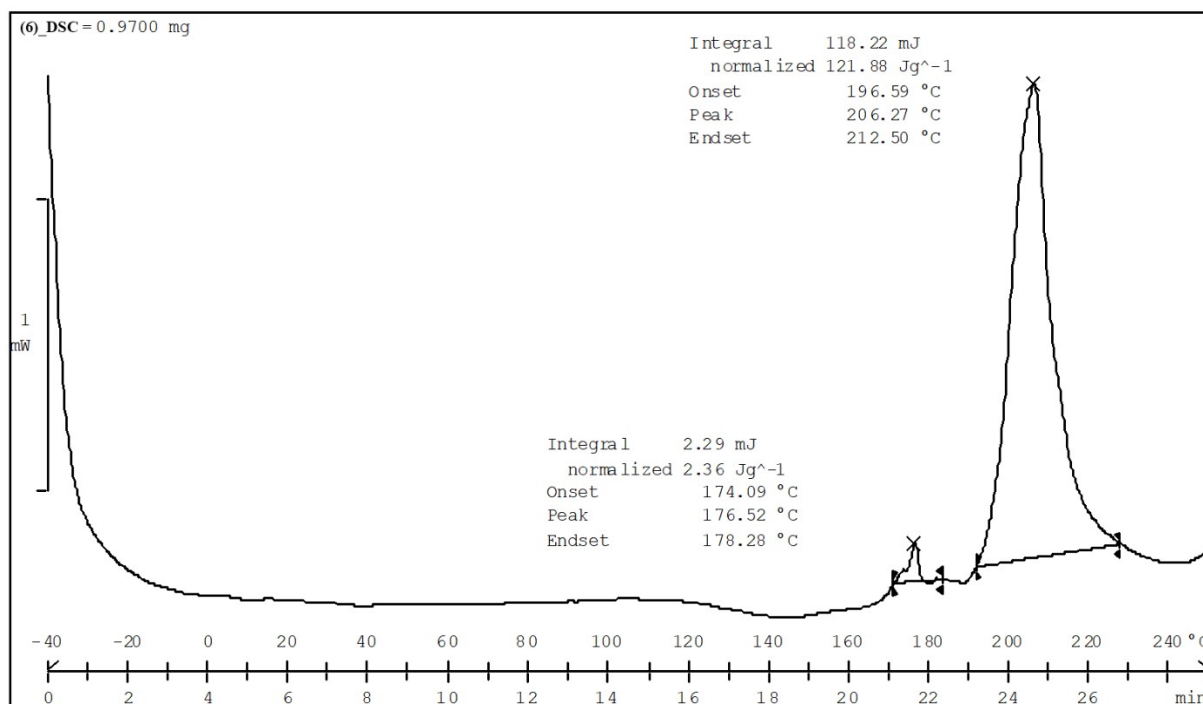

**Figure S19.** The DSC curve of phthalocyanine **6**.

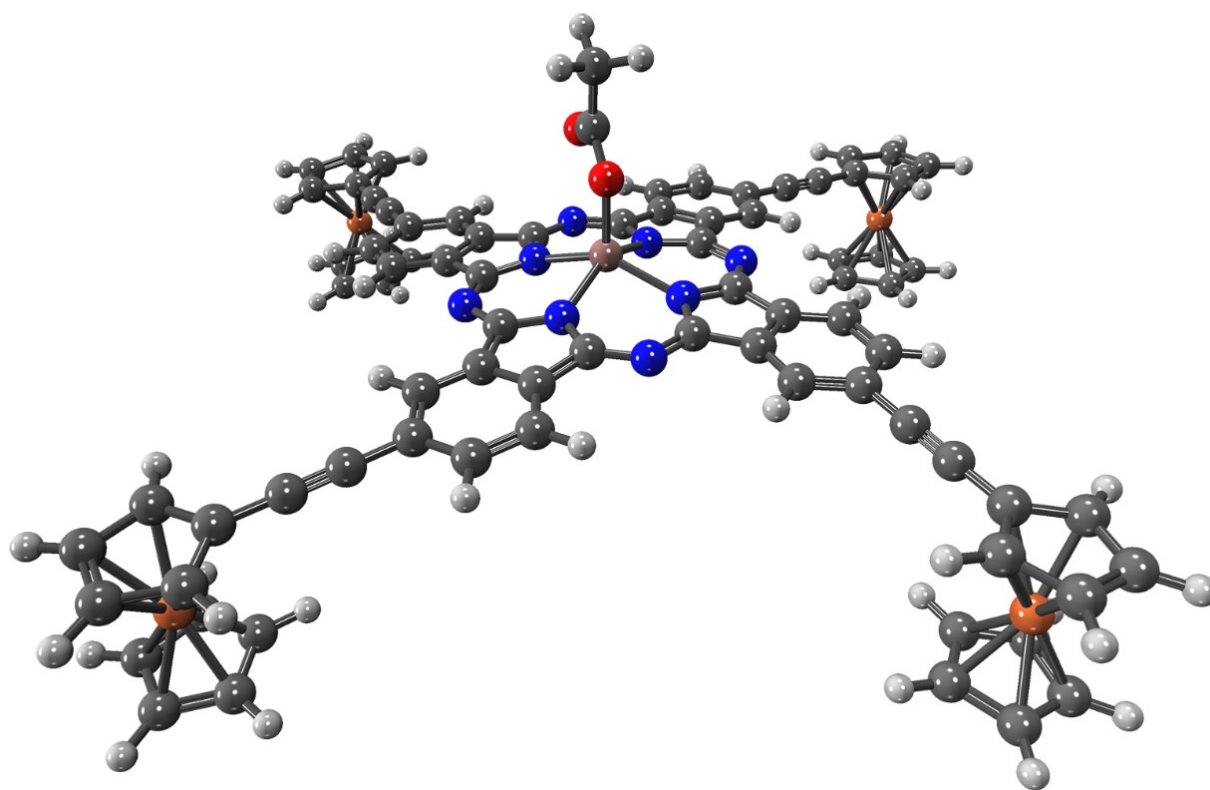

**Figure S20.** The optimized 3D molecular geometry of indium(III) phthalocyanine (**5**).

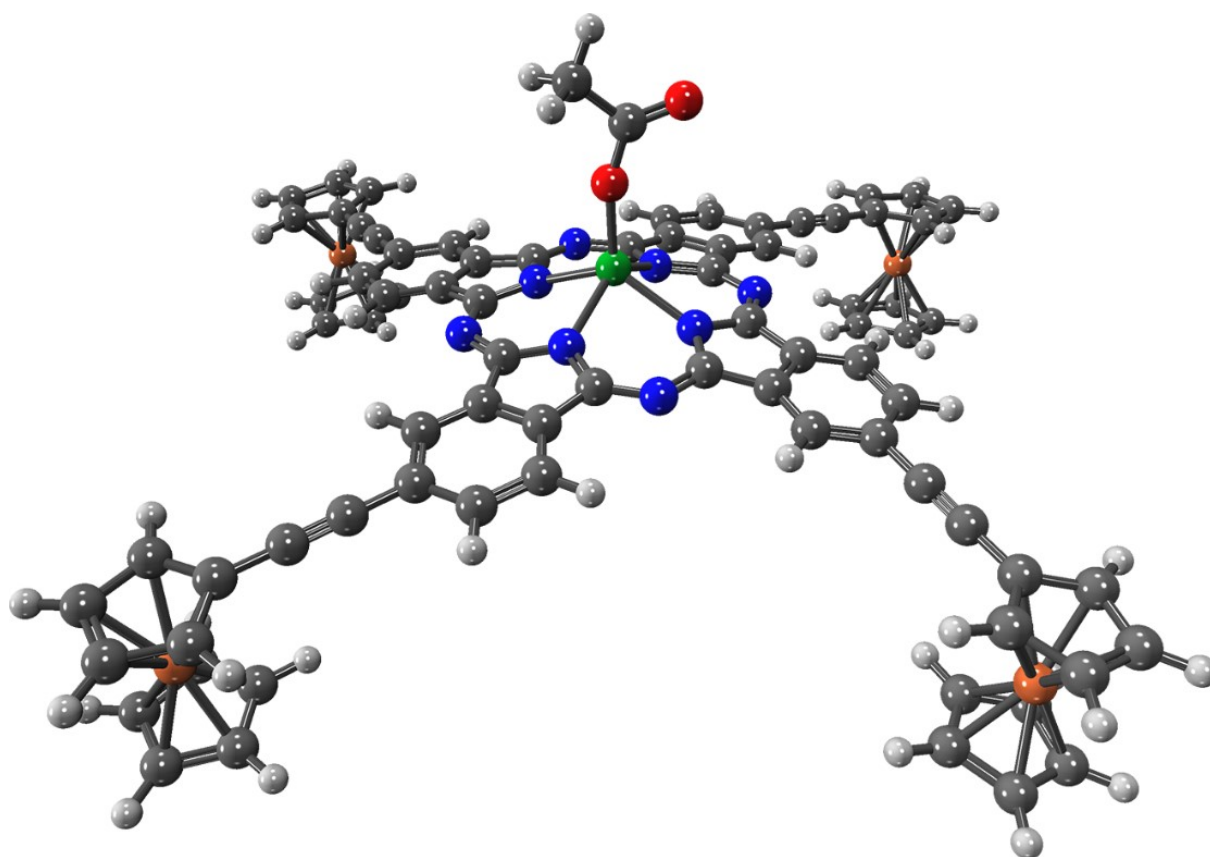

**Figure S21.** The optimized 3D molecular geometry of lutetium(III) phthalocyanine (**6**).

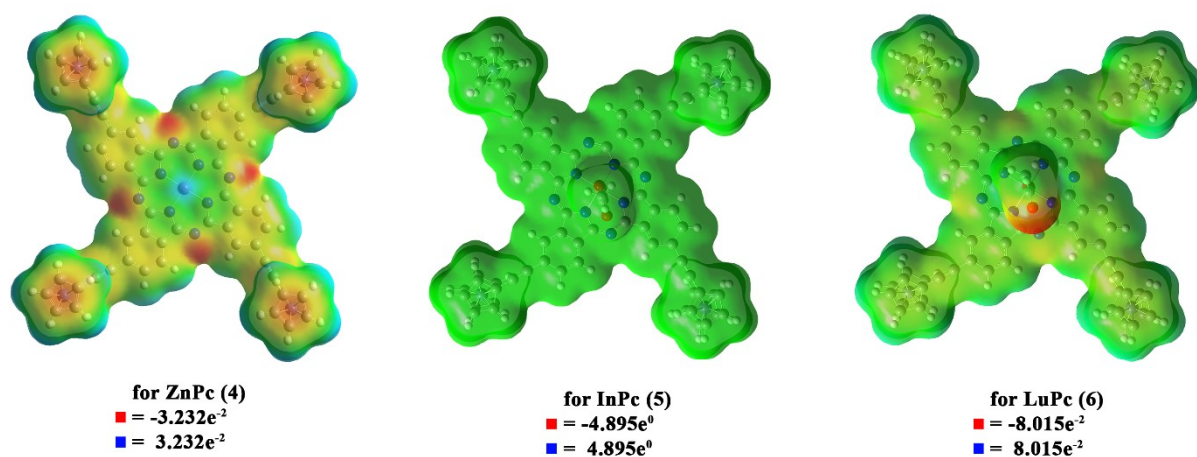

Electronegative region      Neutral      Electropositive Region

Figure S22. The calculated electron density surface of compounds 4-6.
